# Supplementary material for: Metabolic Expenditures of Lunge Feeding Rorquals Across Scale: Implications for the Evolution of Filter Feeding and the Limits to Maximum Body Size
Source: PLoS One. 2012 Sep 14;7(9):e44854. doi: 10.1371/journal.pone.0044854 (PMC3443106; doi:10.1371/journal.pone.0044854)
Supplement: Text S1 — A glossary of symbols and acronyms. (DOC) [file pone.0044854.s001.doc]

**Supporting Information**

**List of Symbols and Acronyms**

**Symbols**

*ac(t) =* Whale acceleration or deceleration

*aw(t) =* Engulfed mass acceleration or deceleration

*Abody =* Cross-section area (at TMJ axial location) of empty whale

*Ac(t) =* Cross-section area (at TMJ axial location) of buccal cavity during engulfment

*C(t)S(t) =* Generic (shape) drag area

*CDbody =* Shape drag coefficient of the body during non-feeding travel

*CDclose =* Shape drag coefficient of the body during mouth-closing

*CDnw =* Unsteady drag coefficient used in equation 18

*CDopen=* Shape drag coefficient of the body during mouth-opening

*CR =* Force coefficient of the combined lift and drag forces generated by the flukes

*dt =* Simulation time increment

*Fext =* Generic external force applied to a whale (including weight and buoyancy)

*FDsteady=* Drag generated by the whale during non-feeding (steady) travel

*FBC =* Force applied on the engulfed mass by the buccal cavity walls

*FED =* Engulfment drag

*fmaxlunge=* Maximum number of lunges in a dive

*FSD =* Shape drag

*Fthrust=* Fluke thrust

*Fthruststeady =* Steady-state fluke thrust obtained by Bose and Lien [26] for a 14.5m fin whale

*Fww=* “Ocean-to-engulfed mass” drag

*hsync =* Scaling factor in the engulfment duration equation (equation 8)

*kam =* Apparent (or “added”) mass coefficient

*kclose =* Reaction constant (mouth-closing stage)

*kopen =* Reaction constant (mouth-closing stage)

*L0 =* Length of the VGB

*Lbody =* Length of the body

*Ljaw =* Lateral projected length of the mandibles

*Mc =* Flesh mass of the whale (i.e., mass of the whale *pre-engulfment*)

*Mw(t) =* Mass of the engulfed water (instant value)

*Mwpost-TMJ* and *Mwant-TMJ =* Maximum capacities of the cavities posterior and anterior to the TMJ

*PTmetab*= Metabolic power expended for performing the mechanical work by *Fthrust*

*PVGBmetab*= Metabolic power expended for performing the mechanical work by *FED*

*Ptransitmetab*= Metabolic power expended for performing the mechanical work by *Fthruststeady*

*rtrans(t) =* Instant cavity radius used in equation 19

*Sfluke =* Fluke surface area

*t =* Time

*tascent =* Ascent time from foraging depth during a dive

*tclose =* Duration of the mouth-closure sub-stage

*tdescent =* Descent time from foraging depth during a dive

*tengulf =* Duration of engulfment (i.e., mouth opening & closure combined)

*tfilter =* Duration of an entire lunge

*tlunge* = Duration of a single lunge (= *tpa* + *tengulf* + *tfilter*)

*topen =* Duration of the mouth-opening sub-stage

*tmaxdive =* Maximum diving time

*tpa =* Duration of the prey-approach stage

*tsearch =* Search time for prey in between lunges (during a dive)

*whead =* Width of the head

*Vc(t) =* Speed of the whale with respect to a fixed reference

*Vflow =* Average speed of the 3-dimensional flow within the cavity

*Vn* = Specific initial speed (= *Vc(0)/L­body*)

*Vw(t) =*Speed of the water engulfed within the cavity with respect to a fixed reference

*Vtan =* Fluid speed tangential to the flukes

Vam = Added mass reference volume

*X =* Mass fraction of body parts expending energy at a rate equal to AMR

*Xjd =* Jaw disarticulation factor

*Xc =* Location of the whale (TMJ) with respect to a fixed reference

*Xw =* Location of the lead engulfed slug with respect to a fixed reference

*Y* = Mass fraction of body parts expending energy at a rate equal to BMR

**Greek symbols**

*Δ =* Angle of the flukes’ lift-drag resultant with respect to the horizontal (Figure 16)

*ΔEO2*= Energetic contents in the blood stored in muscle, blood and lungs

*ΔQTmech*= Mechanical energy expended by *Fthrust*

*ΔQVGBmech*= Mechanical energy expended by *FED*

*ΔQTmetab*= Metabolic energy expended by *Fthrust*

*ΔQVGBmetab*= Metabolic energy expended by *FED*

*ΔXc =* Distance travelled by the whale during time interval *Vc dt*

*χ =* Filling efficiency (buccal cavity ant-TMJ)

*Ξ* = Proportionality constant in equation 19

*φ =* Filling efficiency (buccal cavity post-TMJ)

*Γ =* Scaling factor in the engulfment duration equation (equation 8)

*ω* = Angle between *Vtan* and *Vc*(in Figure 16)

*Ω* = Tail angle with respect to the horizontal

*ρw =* Salt water density

*θgape =* Gape angle

*θgapemax =* Maximum gape angle

*τ =* Time scale of the *shove* (equation 16)

**Acronyms**

AMR = Active metabolic rate

Ant-TMJ = Anterior to the temporomandibular joint

BLF = Basic Lunge Feeding (model)

BMR = Basal metabolic rate of marine mammals

BMR(terr) = Basal metabolic rate of terrestrial mammals

EMR = Engulfment metabolic rate

EMR* = “Instant” engulfment metabolic rate, i.e. calculated over 0.1s intervals

MMR = Maximum metabolic rate

PAMR = Prey-Approach Metabolic Rate

Post-TMJ = Posterior to the temporomandibular joint

RAAMR = Rorqual average active metabolic rate

F/RMR = Metabolic rate during the filter and recovery stage

SE = Synchronized engulfment

TADL = Theoretical aerobic diving limit

TMJ = Temporomandibular joint

VGB = Ventral groove blubber
